# Supplementary material for: Encapsulation of Ciprofloxacin into Cyclodextrin Polymer Matrix: The Complex Formation with Human Serum Albumin and In Vitro Studies
Source: Preprints.org preprint supplement (doi:10.20944/preprints202306.0760.v1), 2023-06-12
Supplement: Supplementary file 1 [file supplementary]

Article

Encapsulation of Ciprofloxacin into Cyclodextrin Polymer Matrix: The Complex Formation with Human Serum Albumin and *In Vitro* Studies

Tatiana Yu. Kopnova, Anna A. Skuredina, Natalya G. Belogurova, Elena V. Kudryashova

**Supplementary**

| 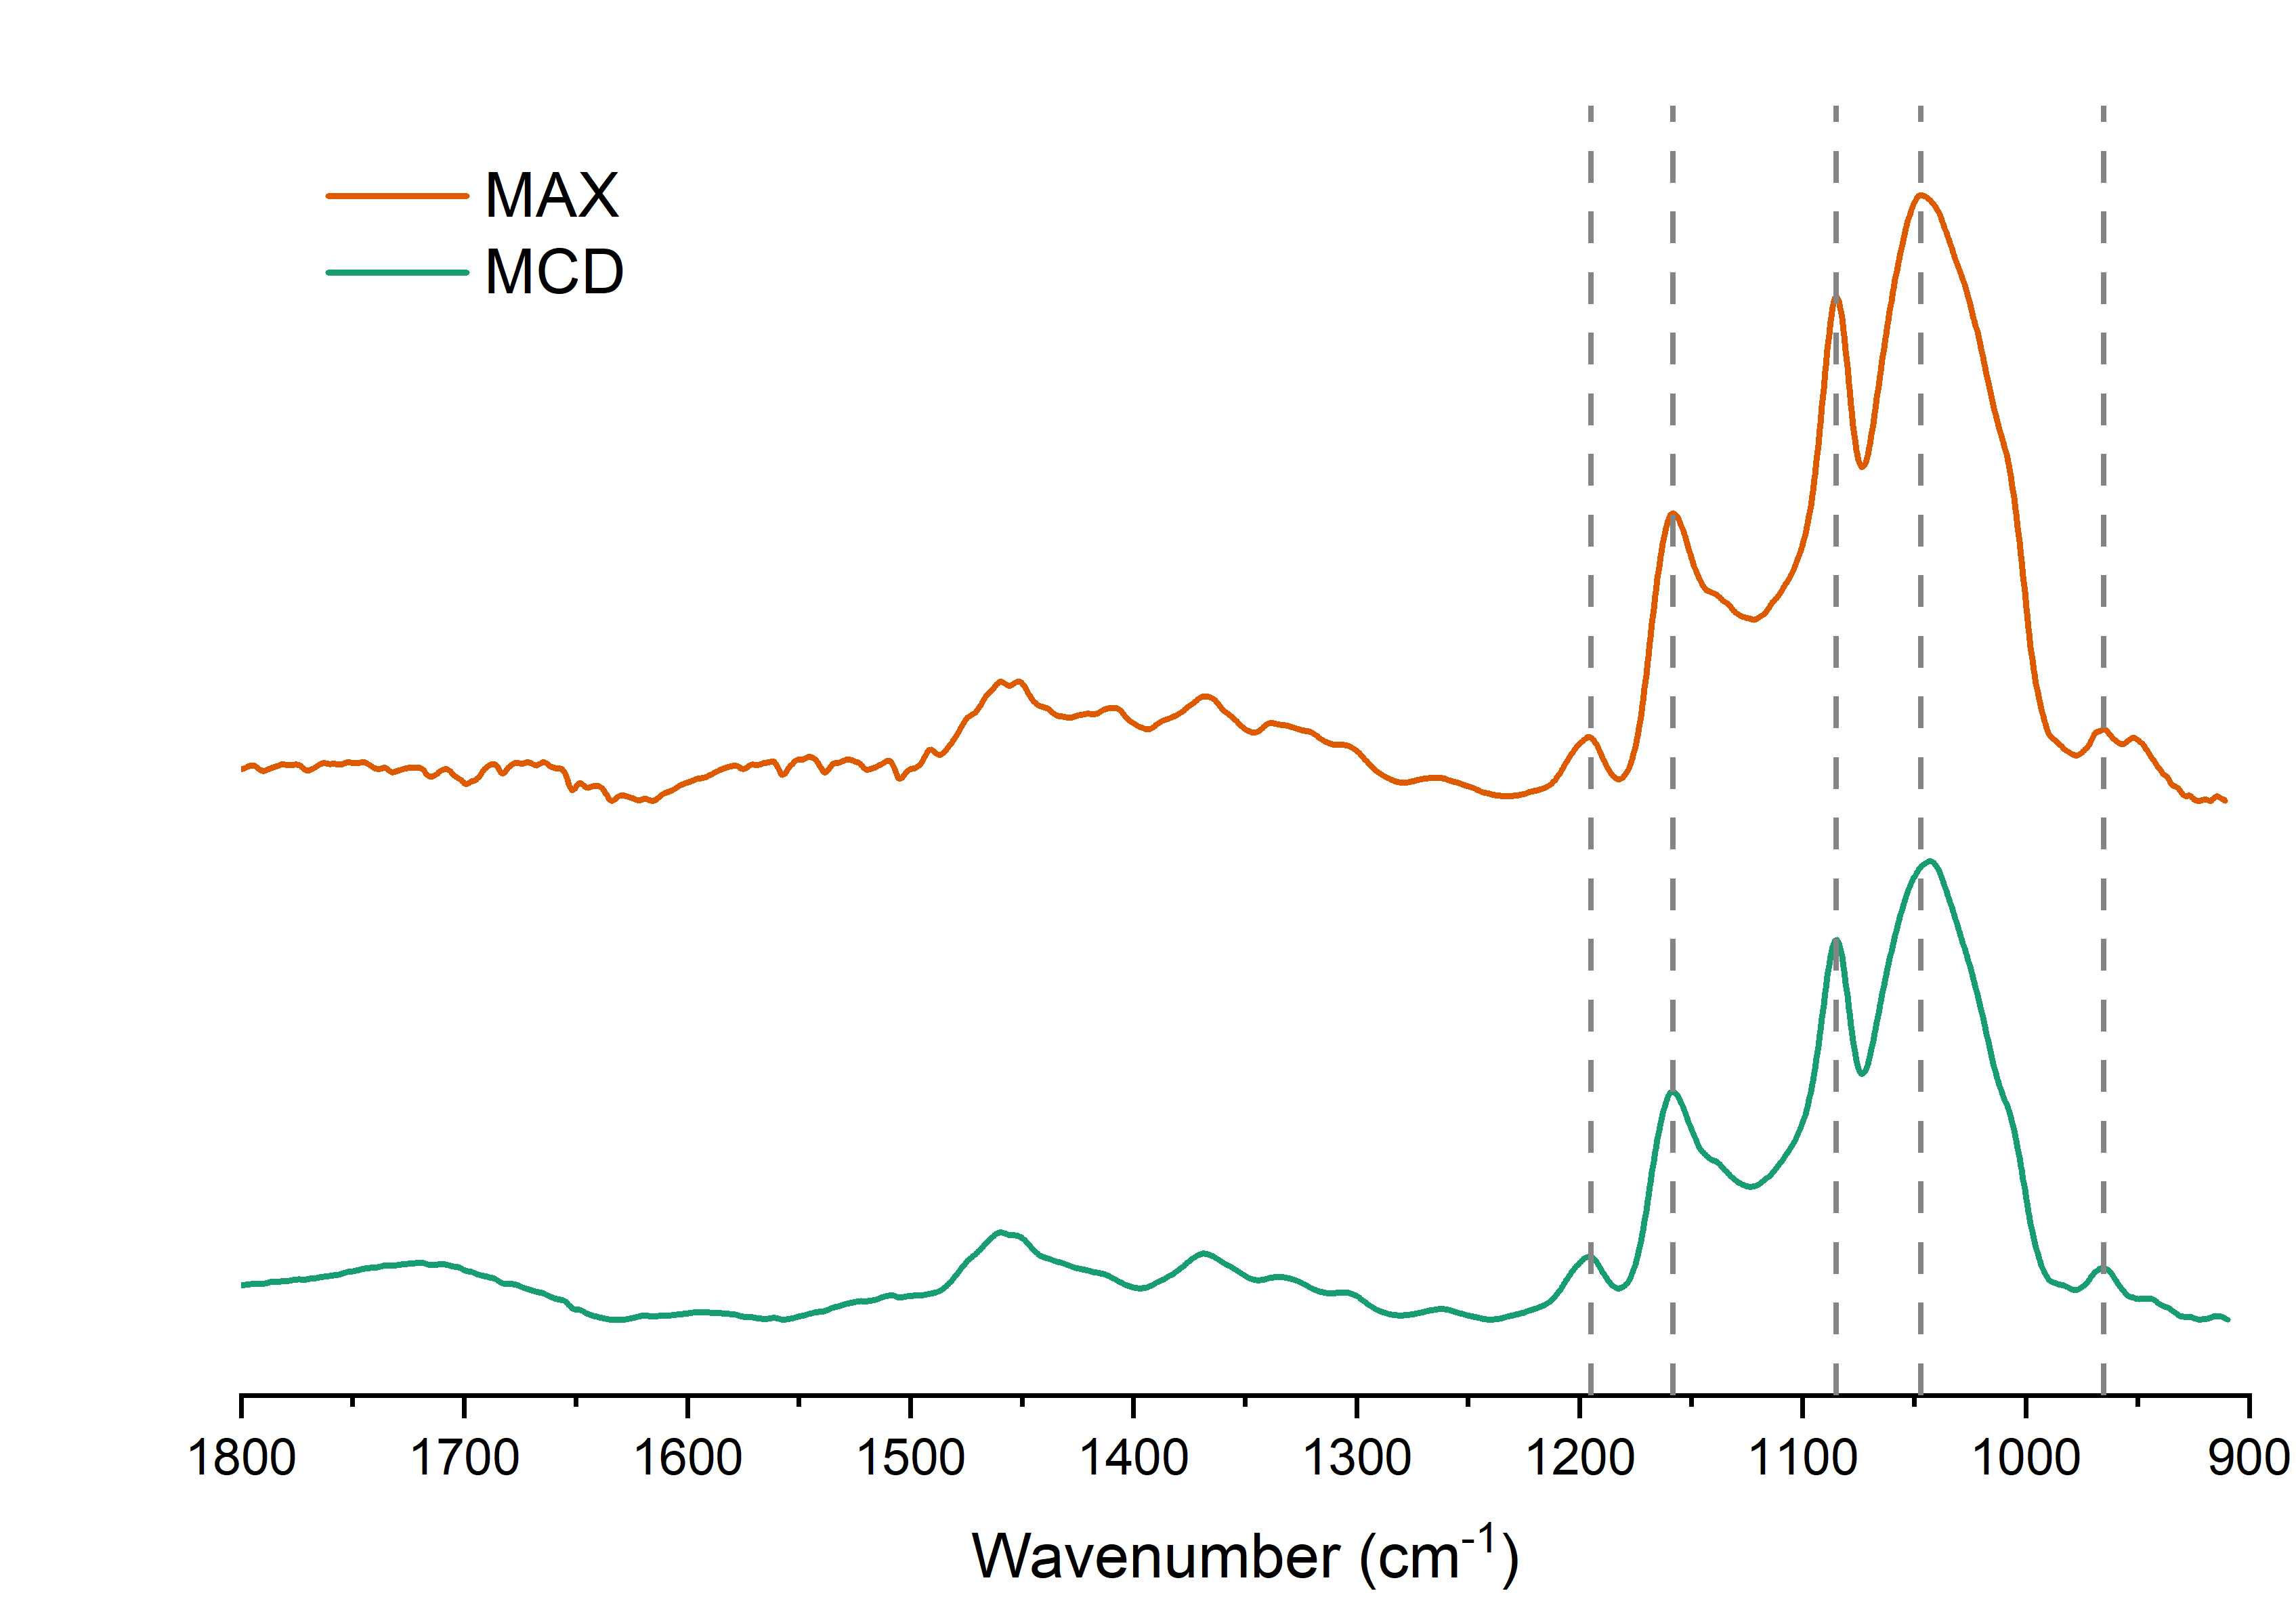 | 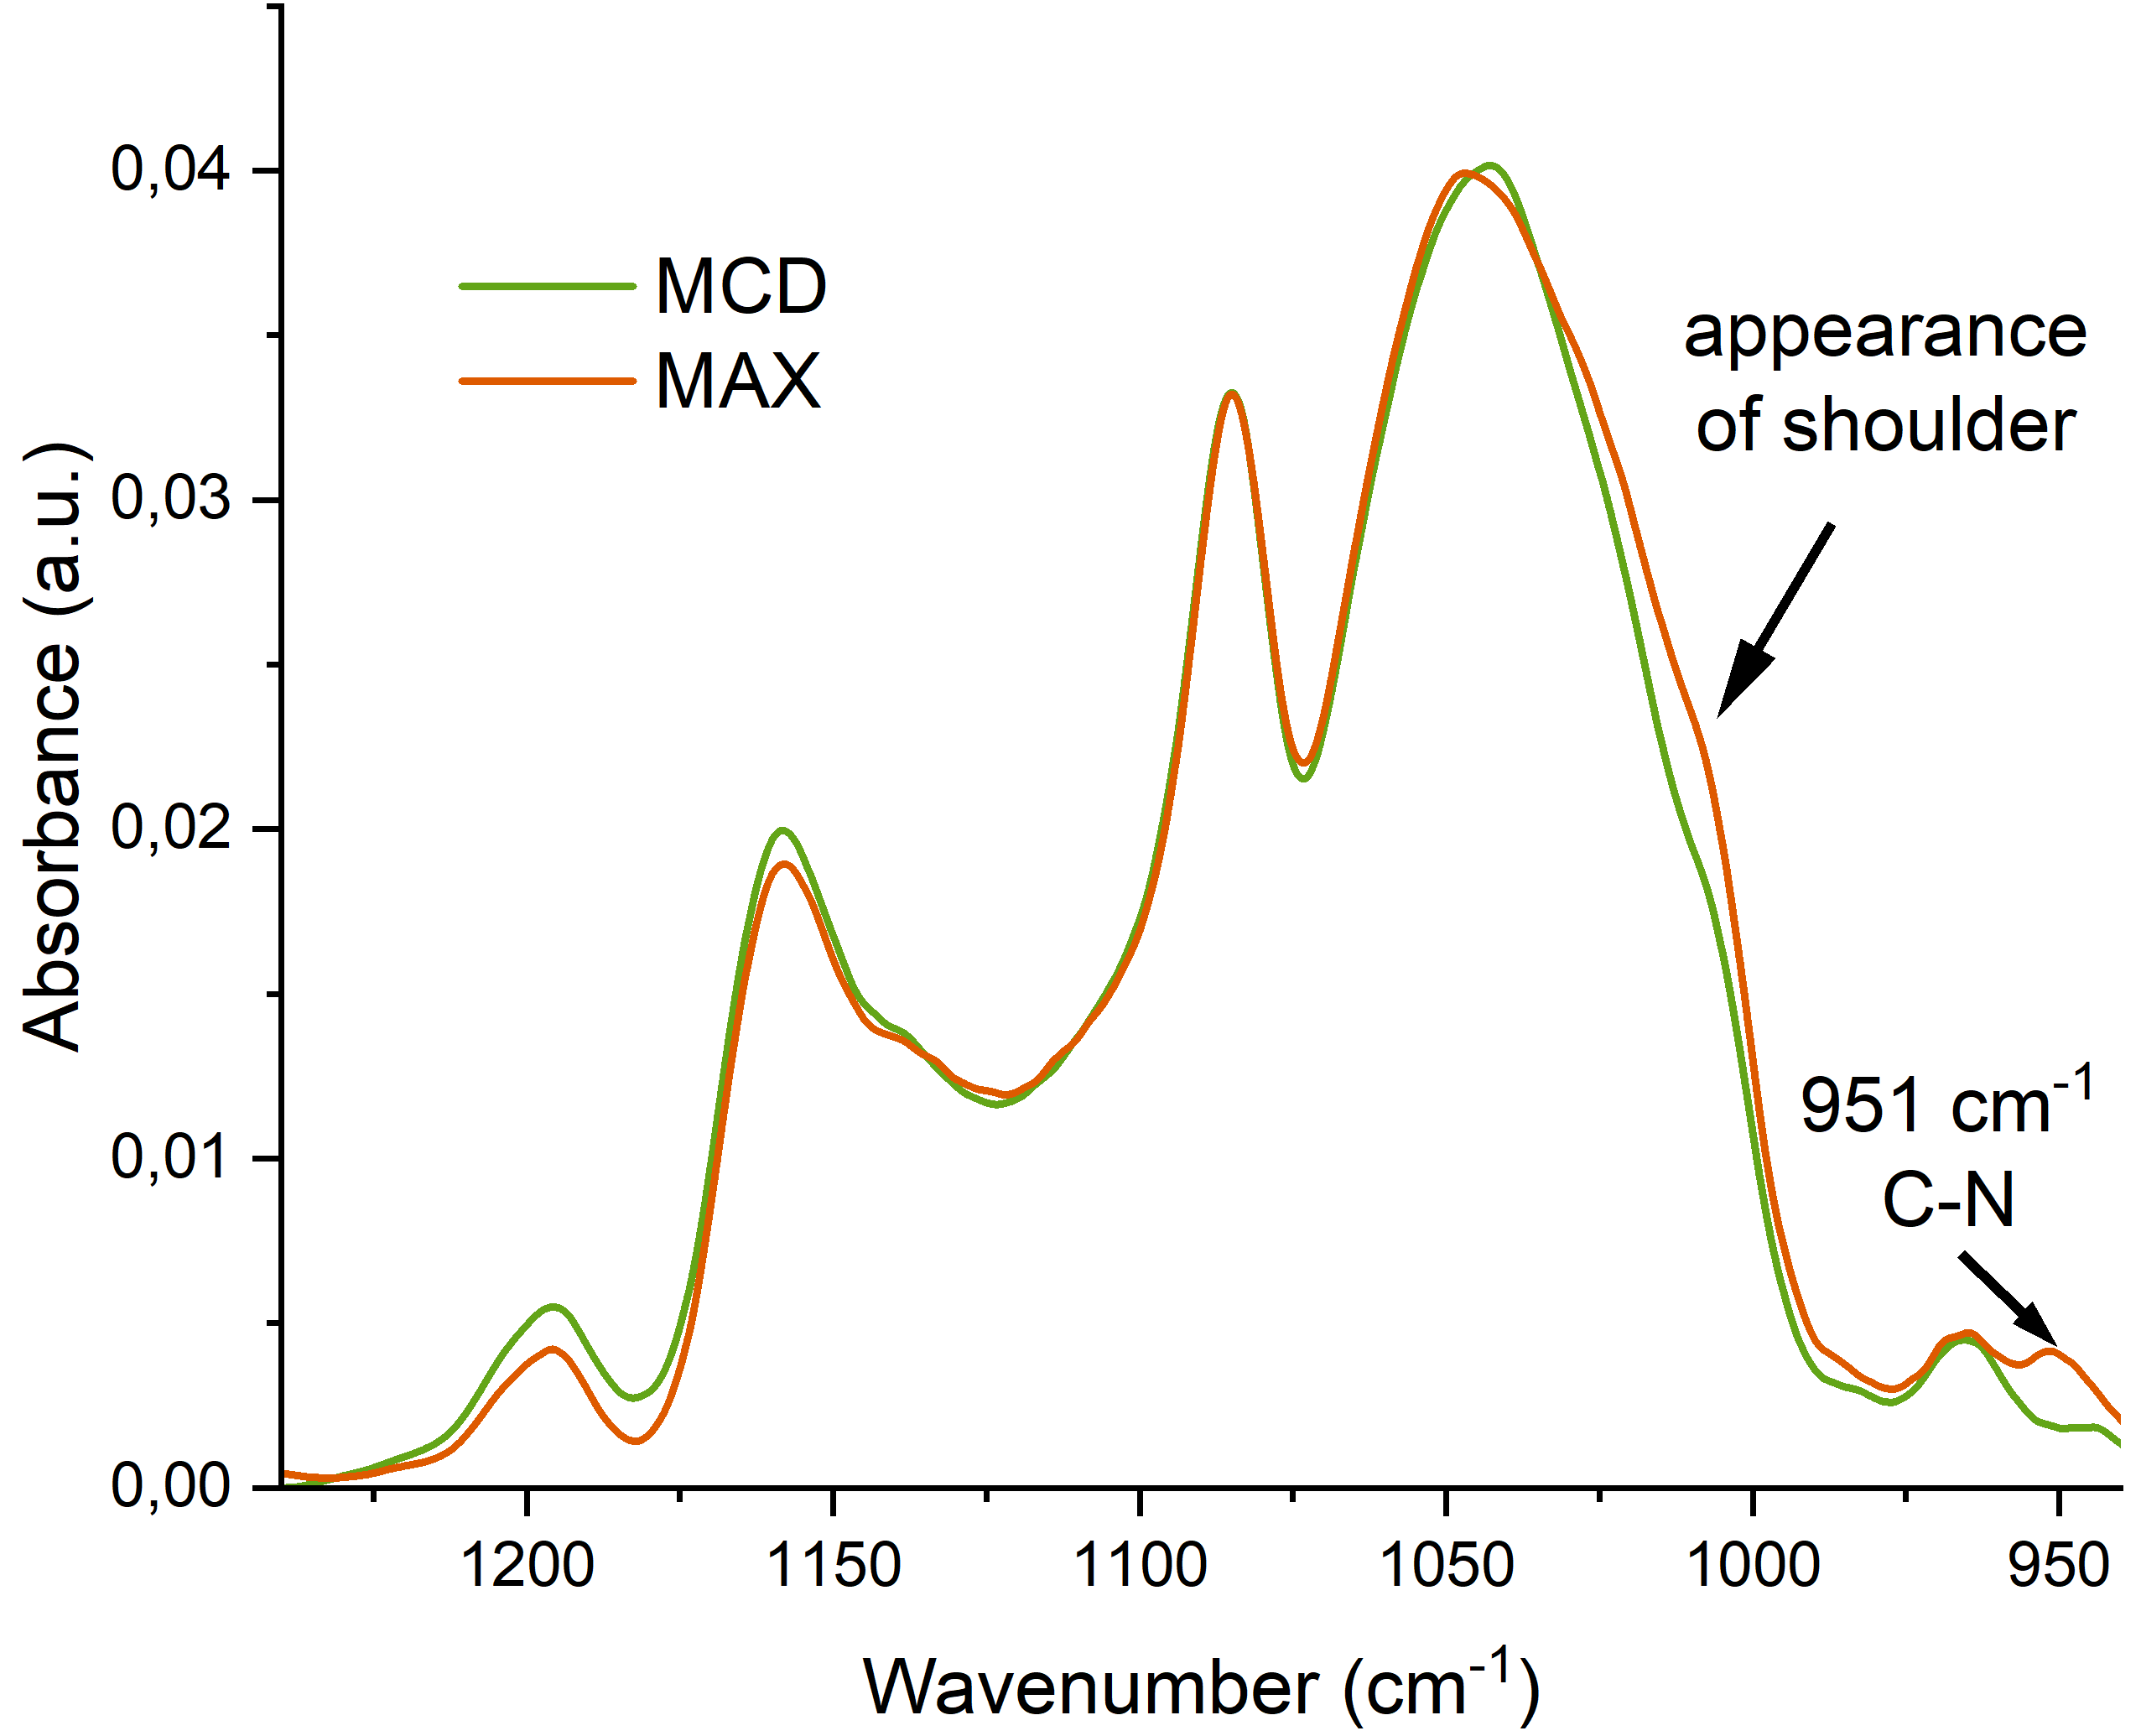 |
| --- | --- |
| (**a**) | (**b**) |

**Figure S1.** (a) Normalized FTIR spectra of MCD (green) and MAX (orange) pH 7.4, 22 °C. (b) Normalized FTIR spectra of MCD (green) and MAX (orange) range 1240 − 900 cm−1 in details pH 7.4, 22 °C.
